# Supplementary material for: Preparation of functionalized diene-elastomers upon top-down pyrolysis of their vulcanizates via dynamic covalent polymerization
Source: Royal Society of Chemistry journal article supplement (doi:10.1039/d3ta00478c), 2023-01-01
Supplement: d3ta00478c1.pdf [file d3ta00478c1.pdf]

## Supplementary Information

### Preparation of Functionalized Diene-Elastomers upon Top-Down Pyrolysis of Vulcanizates via Dynamic Covalent Polymerization

*Xinglong An,<sup>a</sup> Siwu Wu,<sup>\*a</sup> Shafan Xiong,<sup>a</sup> Shuangjian Yu,<sup>a</sup> Zhenghai Tang,<sup>a</sup> Baochun  
Guo,<sup>\*a</sup> and Liqun Zhang<sup>\*ab</sup>*

<sup>a</sup> Institute of Emergent Elastomers, School of Materials Science and Engineering,  
South China University of Technology, Guangzhou 510640, China

<sup>b</sup> State Key Laboratory of Organic/Inorganic Composites, Beijing University of  
Chemical Technology, Beijing 100029, China

\*Email: wusiwu@scut.edu.cn (S.W.);  
psbcguo@scut.edu.cn (B.G.)  
zhanglq@buct.edu.cn (L.Z.)

**Number of pages: 13**

**Number of figures: 8**

**Number of tables: 4**

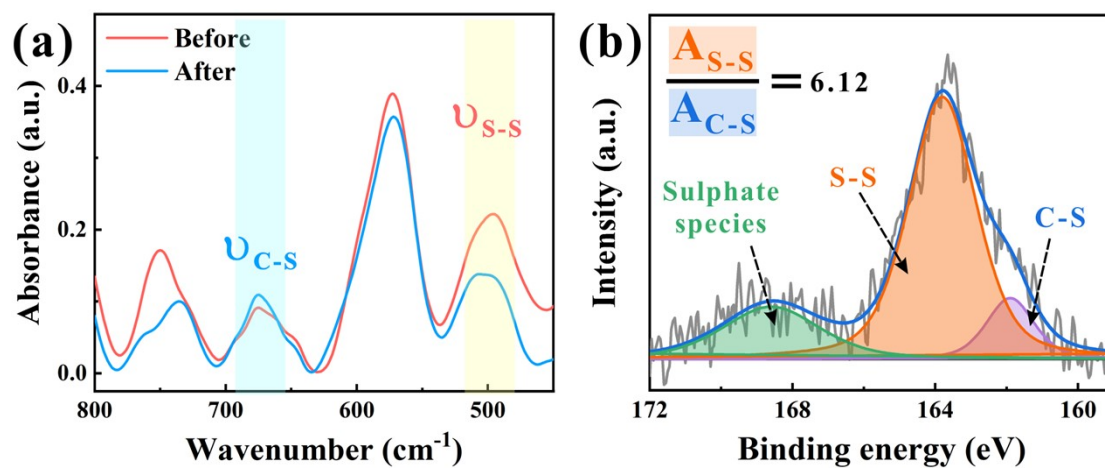

**Figure S1.** (a) FTIR spectra of HS-NR granules before and after selectively cleaving disulfide/polysulfide linkages. (b) High-resolution S2p spectrum of HS-NR granules.

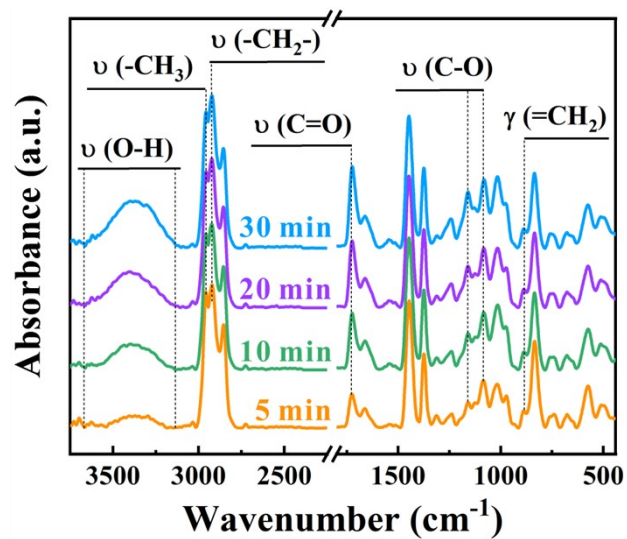

Figure S2. FTIR spectra of HM5-y-170 samples.

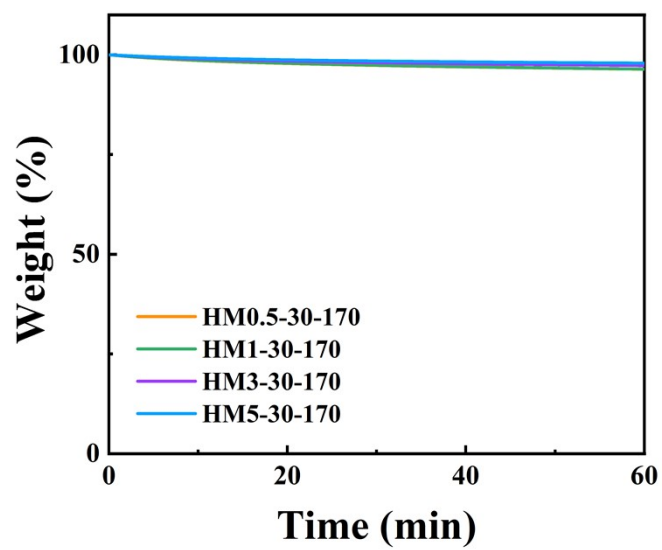

Figure S3. TGA profiles of HM $x$ -30-170 samples

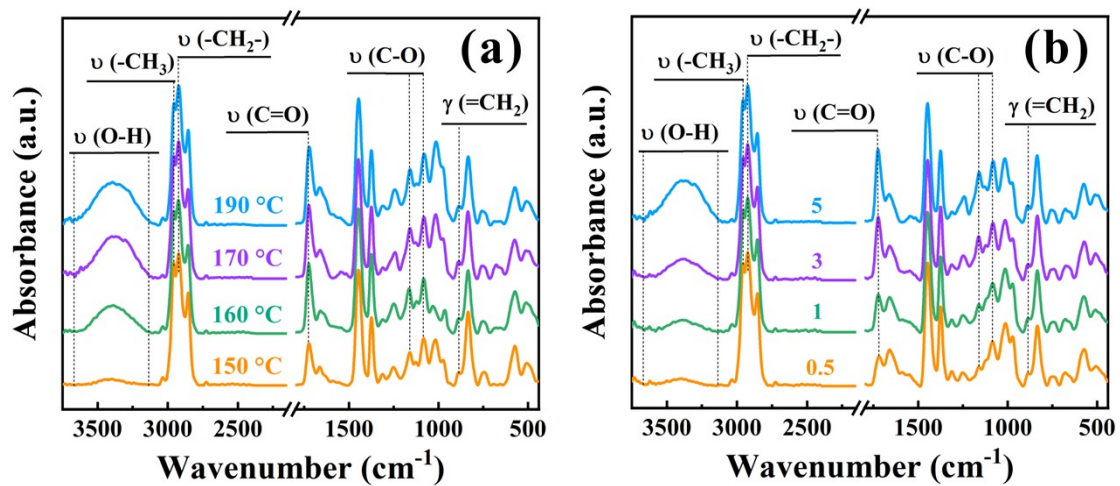

Figure S4. FTIR spectra of HM5-30-z (a) and HMx-30-170 (b) samples.

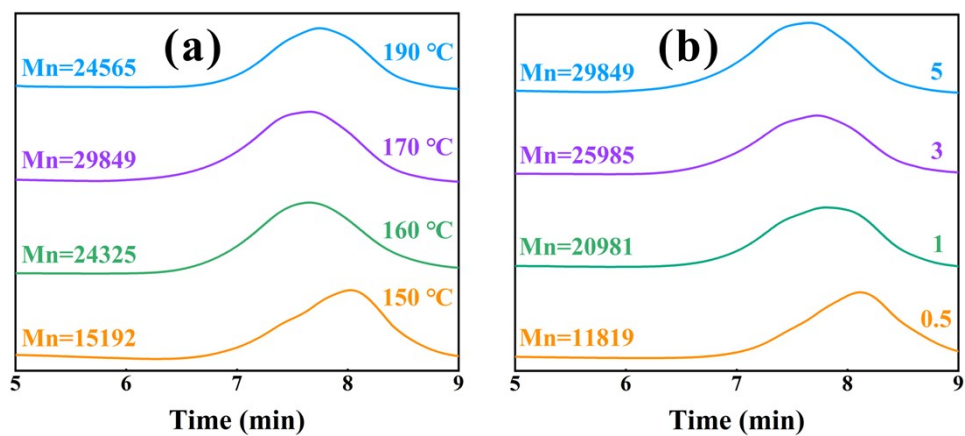

**Figure S5.** GPC profiles of HM5-30-z (a) and HMx-30-170 (b) samples.

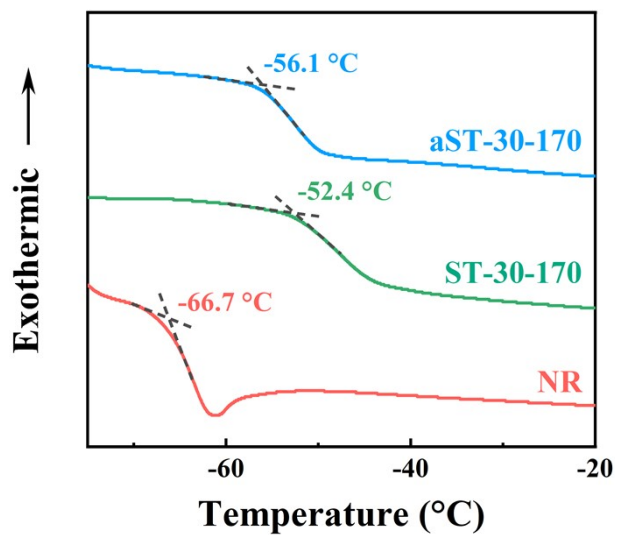

Figure S6. DSC profiles of NR gum, ST-30-170 and aST-30-170.

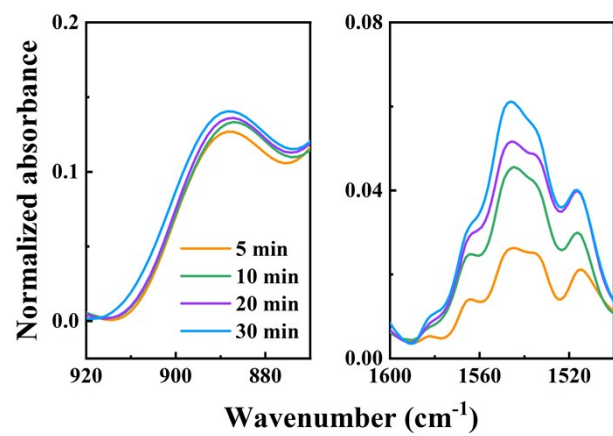

**Figure S7.** Detailed view of FTIR spectra of HM5-g-170 samples.



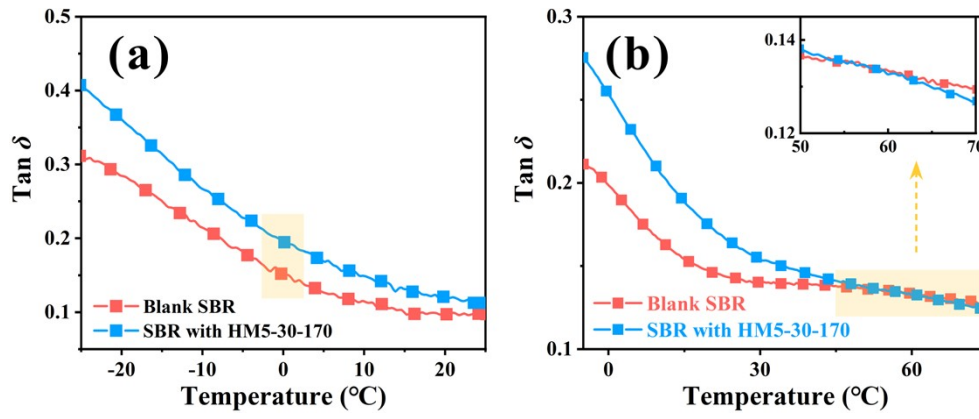

**Figure S8.** Temperature-dependent loss tangent ( $\tan \delta$ ) curves of blank SBR and SBR with HM5-30-170 composites: skid resistance (a) and rolling resistance (b) experiments.

**Table S1.** Formulations of sulfur-crosslinked rubber granules.

| Sample code | NR <sup>a</sup> (g) | SBR <sup>b</sup> (g) | ZnO <sup>c</sup> (g) | Sta <sup>d</sup> (g) | CZ <sup>e</sup> (g) | S <sup>f</sup> (g) |
|-------------|---------------------|----------------------|----------------------|----------------------|---------------------|--------------------|
| HS-NR       | 100                 | -                    | 5                    | 1                    | 3                   | 10                 |
| HS-SBR      | -                   | 100                  | 5                    | 1                    | 3                   | 10                 |

aNR: Natural rubber; bSBR: Styrene butadiene rubber; <sup>c</sup>ZnO: Zinc oxide; <sup>d</sup>Sta: Stearic acid; <sup>e</sup>CZ: N-Cyclohexyl-2-benzothiazole sulfonamide; <sup>f</sup>S: Sulfur; Cross-linking temperatures of HS-NR and HS-SBR are 143 °C and 150 °C, respectively.

**Table S2.** Formulations of all rubber composites.

| Sample code         | SBR<br>(g) | HM5-30-170<br>(g) | Silica<br>(g) | ZnO <sup>a</sup><br>(g) | Sta <sup>b</sup><br>(g) | CZ <sup>c</sup><br>(g) | DM <sup>d</sup><br>(g) | S <sup>e</sup><br>(g) |
|---------------------|------------|-------------------|---------------|-------------------------|-------------------------|------------------------|------------------------|-----------------------|
| Blank SBR           | 100        | -                 | 40            | 5                       | 2                       | 1.5                    | 0.5                    | 1.5                   |
| SBR with HM5-30-170 | 90         | 10                | 40            | 5                       | 2                       | 1.5                    | 0.5                    | 1.5                   |

<sup>a</sup>ZnO: Zinc oxide; <sup>b</sup>Sta: Stearic acid; <sup>c</sup>CZ: N-cyclohexyl-2-benzothiazole sulfonamide; <sup>d</sup>DM: 2,2'-dibenzothiazole disulfide. <sup>e</sup>S: Sulfur; Cross-linking temperatures: 150 °C.

**Table S3.** Elemental contents of HM5-y-170 systems.

| Sample code | N (%) | C (%) | H (%) | S (%) | O (%)  |
|-------------|-------|-------|-------|-------|--------|
| NR          | 0.40  | 84.60 | 11.41 | 0     | 4.750  |
| HM5-5-170   | 0.00  | 76.57 | 10.47 | 5.05  | 6.144  |
| HM5-10-170  | 0.01  | 73.40 | 10.02 | 5.69  | 7.974  |
| HM5-20-170  | 0.00  | 73.27 | 10.45 | 5.30  | 8.346  |
| HM5-30-170  | 0.02  | 71.98 | 10.83 | 5.33  | 11.168 |

**Table S4.** Mechanical properties of rubber composites. The standard deviation for each sample was determined from 6 specimens.

| Sample code         | TS <sup>a</sup> (MPa) | EB <sup>b</sup> (%) | TM <sup>c</sup> (MPa) |
|---------------------|-----------------------|---------------------|-----------------------|
| SBR                 | 23.3±1.7              | 983±32              | 2.9±0.1               |
| SBR with HM5-30-170 | 27.4±1.6              | 791±25              | 5.2 ±0.1              |

<sup>a</sup>TS: Tensile strength; <sup>b</sup>EB: Elongation at break; <sup>c</sup>TM: Tensile modulus.
